# Supplementary material
Source: PubMed Central journal article supplement (PMC5849481)

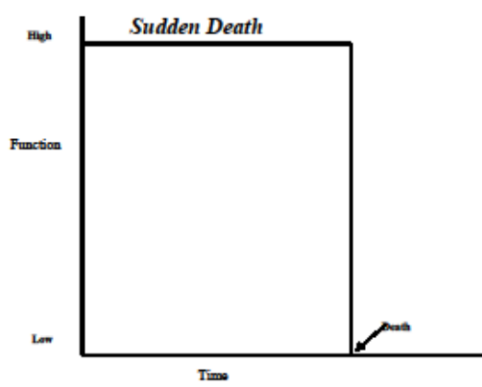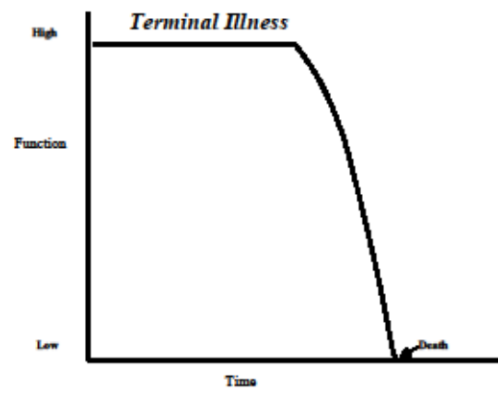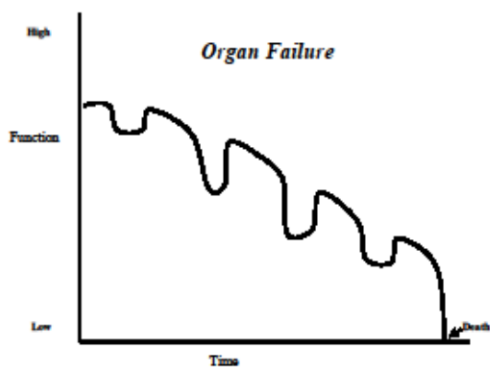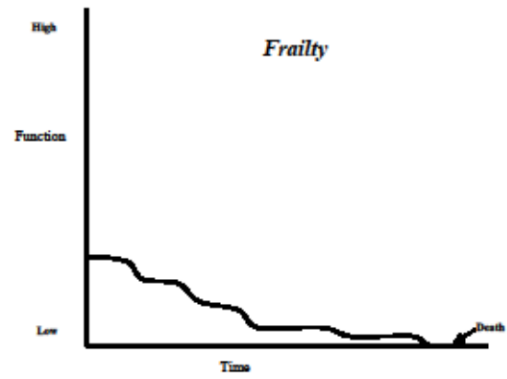

Supplement: NIHMS918469-supplement-Supp_FigS1.pdf [file NIHMS918469-supplement-Supp_FigS1.pdf]

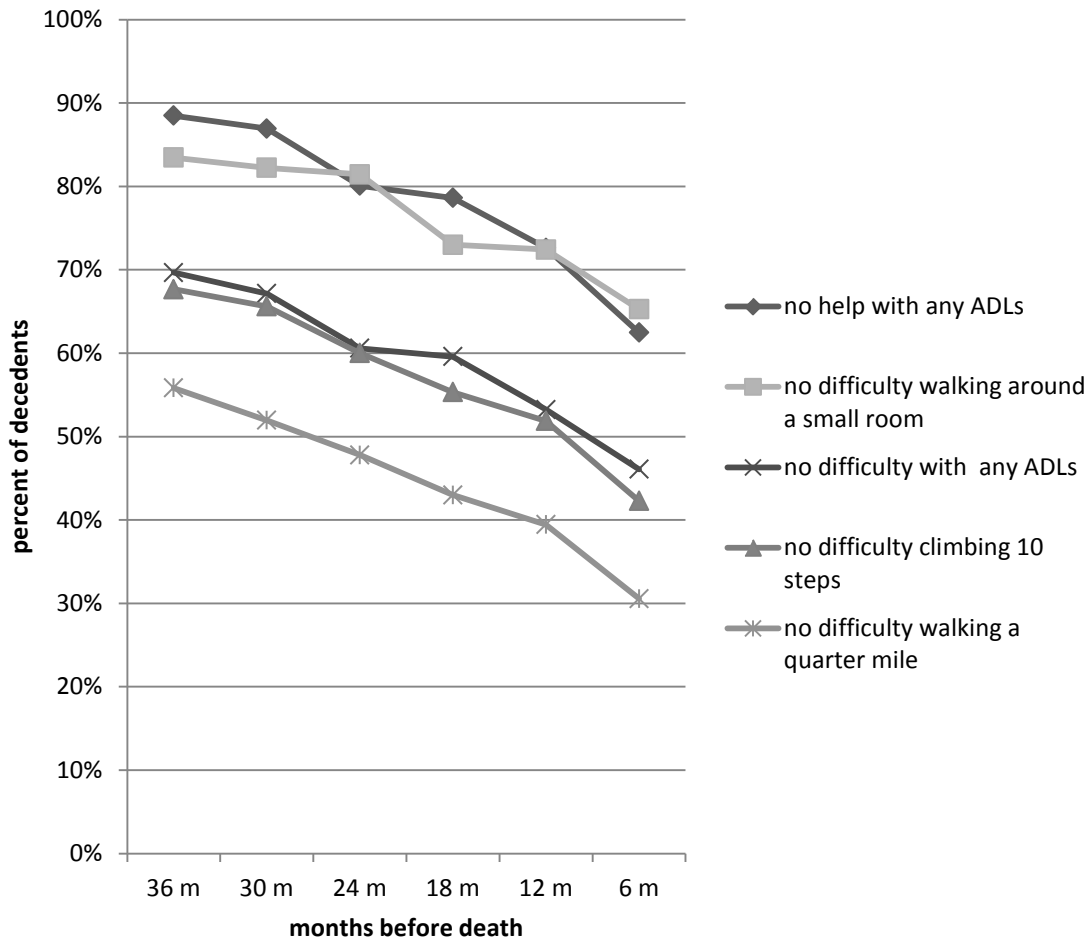

Supplement: NIHMS918469-supplement-Supp_FigS2.pdf [file NIHMS918469-supplement-Supp_FigS2.pdf]
